# Supplementary material for: In silico prioritization and further functional characterization of SPINK1 intronic variants
Source: Springer Nature journal article supplement (doi:10.1186/s40246-017-0103-9), 2017-05-04
Supplement: 40246_2017_103_MOESM2_ESM.pdf [file 40246_2017_103_MOESM2_ESM.pdf]

**Table S1** *In vitro* observed and *in silico* predicted mRNA splicing phenotypes associated with the 24 *SPINK1* intronic variants under study

| Intron | Variant                 | SpliceSiteFinder-like (0-100) | MaxEntScan (0-12) | NNSPLICE (0-1)   | GeneSplicer (0-15) | Human Splicing Finder (0-100)          | Functional analysis of mRNA splicing phenotype <sup>a</sup> (category <sup>b</sup> ) |
|--------|-------------------------|-------------------------------|-------------------|------------------|--------------------|----------------------------------------|--------------------------------------------------------------------------------------|
| 1      | c.56-619T>C             | –                             | –                 | –                | –                  | –                                      | Normal (1)                                                                           |
| 1      | c.56-151T>C             | –                             | –                 | –                | –                  | –                                      | Normal (1)                                                                           |
| 1      | c.56-62T>C              | –                             | –                 | –                | –                  | –                                      | Normal (1)                                                                           |
| 2      | c.87+1G>A               | dss 79.8→0                    | dss 8.3→0         | dss 0.9→0        | dss 0.6→0          | dss 84.1→0                             | Complete exon 2 skipping                                                             |
| 2      | c.87+26T>C              | –                             | –                 | –                | –                  | –                                      | Normal (1)                                                                           |
| 2      | <b>c.87+363A&gt;G</b>   | –                             | –                 | –                | –                  | <b>dss 0→65.5</b><br><b>ass 0→83.3</b> | <b>Normal (3)</b>                                                                    |
| 2      | c.87+705G>T             | –                             | –                 | –                | –                  | –                                      | Normal (1)                                                                           |
| 2      | c.88-559C>T             | –                             | –                 | –                | –                  | –                                      | Normal (1)                                                                           |
| 2      | c.88-352A>G             | –                             | –                 | –                | –                  | ass 72.3→0                             | Normal (2)                                                                           |
| 2      | c.88-23A>T              | –                             | –                 | –                | –                  | –                                      | Normal (1)                                                                           |
| 3      | c.194+2T>C              | dss 82.6→72.3                 | dss 11.1→0        | dss 1.0→0        | dss 4.0→0          | dss 92.1→0                             | Partial exon 3 skipping                                                              |
| 3      | <b>c.194+13T&gt;G</b>   | <b>dss 0→82.0</b>             | <b>dss 0→9.5</b>  | <b>dss 0→0.9</b> | –                  | <b>dss 0→86.9</b>                      | <b>Normal (3)</b>                                                                    |
| 3      | c.194+90A>T             | –                             | –                 | –                | –                  | ass 68.0→0                             | Normal (2)                                                                           |
| 3      | c.194+184T>A            | –                             | –                 | –                | –                  | dss 73.2→0                             | Normal (2)                                                                           |
| 3      | c.194+1159C>G           | –                             | –                 | –                | –                  | –                                      | Normal (1)                                                                           |
| 3      | <b>c.194+1504A&gt;G</b> | <b>dss 0→77.2</b>             | –                 | <b>dss 0→0.7</b> | –                  | <b>dss 0→83.2</b>                      | <b>Normal (3)</b>                                                                    |
| 3      | c.195-1645G>C           | –                             | –                 | –                | –                  | –                                      | Normal (1)                                                                           |
| 3      | c.195-1570C>A           | –                             | –                 | –                | –                  | dss 0→65.3                             | Normal (3)                                                                           |
| 3      | c.195-1538C>T           | –                             | –                 | –                | –                  | –                                      | Normal (1)                                                                           |

|          |                        |            |                  |                  |   |                   |                   |
|----------|------------------------|------------|------------------|------------------|---|-------------------|-------------------|
| 3        | c.195-1399G>A          | dss 75.8→0 | –                | –                | – | ass 0→79.2        | Normal (3)        |
| 3        | c.195-478T>G           | –          | –                | –                | – | –                 | Normal (1)        |
| 3        | c.195-414C>T           | –          | –                | –                | – | –                 | Normal (1)        |
| <b>3</b> | <b>c.195-323C&gt;T</b> | –          | <b>dss 0→6.3</b> | <b>dss 0→0.7</b> | – | <b>dss 0→75.1</b> | <b>Normal (3)</b> |
| 3        | c.195-73_72delCT       | –          | –                | –                | – | –                 | Normal (1)        |

The column shaded in grey was excluded from consideration. The two canonical splice site variants are highlighted in blue. The four variants that were selected for quantitative RT-PCR analysis in the present study are highlighted in bold. The obvious inappropriate predictions are highlighted in red. Abbreviations: dss, donor splice site; ass, acceptor splice site.

<sup>a</sup>In accordance with Zou et al. [2, 3].

<sup>b</sup>Refer to text for details.
